# Supplementary material
Source: bioRxiv or medRxiv preprint supplement (https://www.biorxiv.org/highwire/filestream/10300/field_highwire_adjunct_files/1/038430-2.pdf)

## UK Biobank participants included in the primary analyses

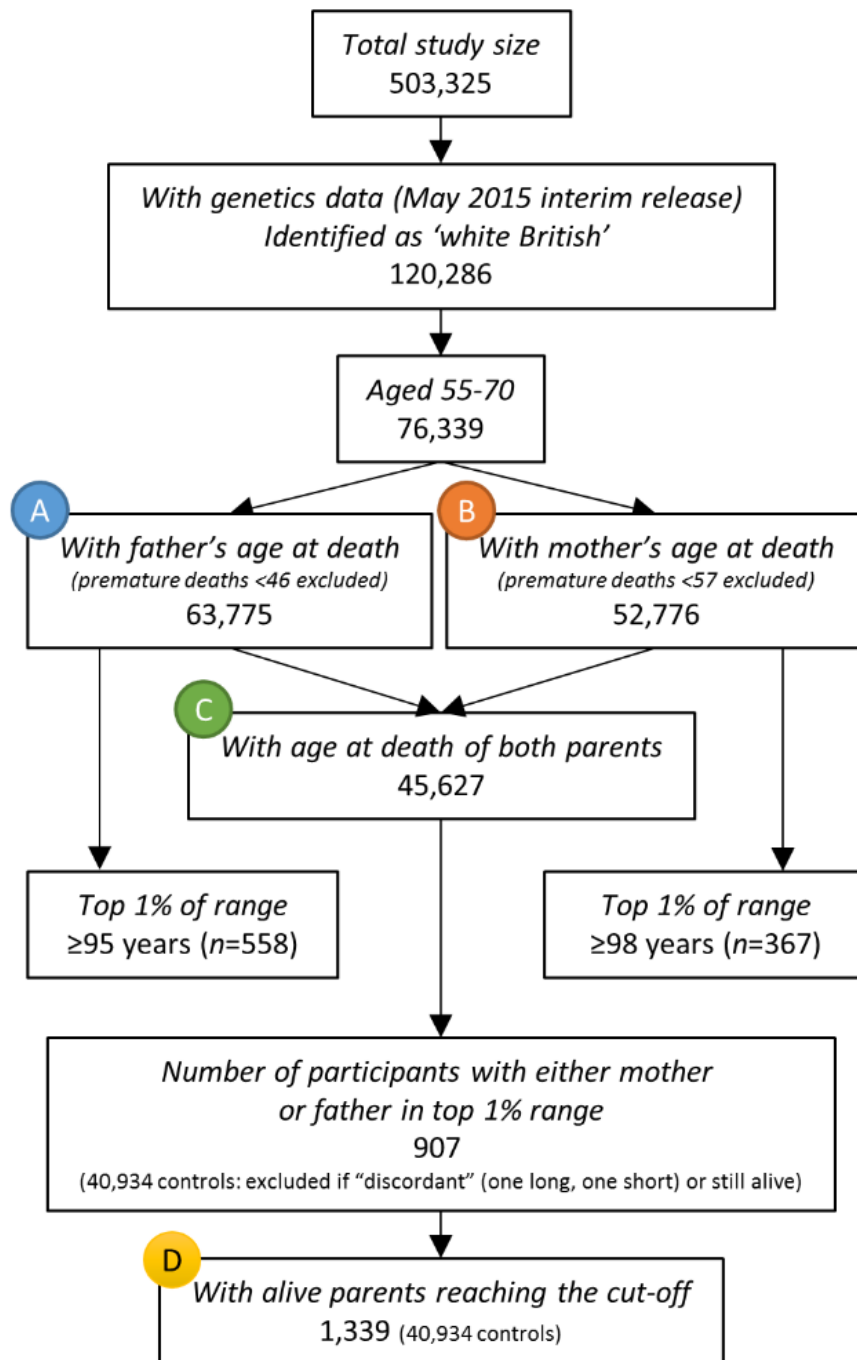

Highlighted here with A-D

- A) Father's age at death,
- B) Mother's age at death,
- C) Combined parental age at death (z-scored),
- D) Binary phenotype: at least one parent attained the top 1% cut-off, derived from the mother's/father's ages at death

75,244 participants included in at least one analysis

# QQ plot for GWAS of father's age at death in 63,775 UK Biobank participants (9million imputed variants)

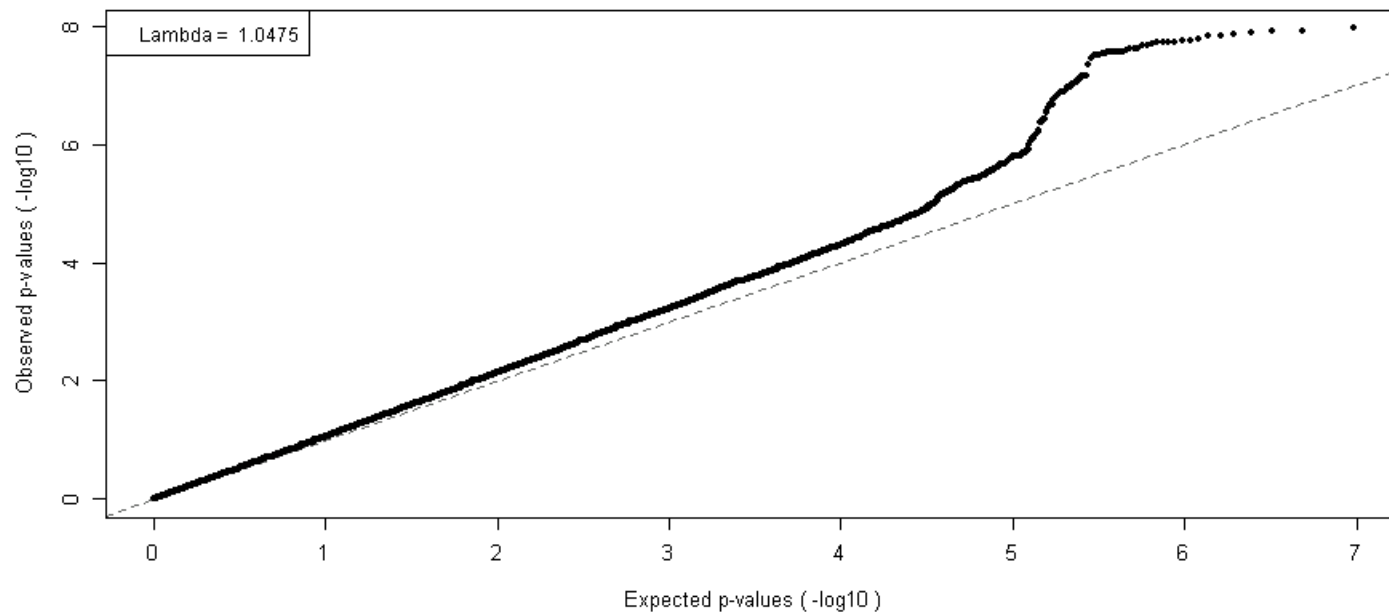

Manhattan plot of above data

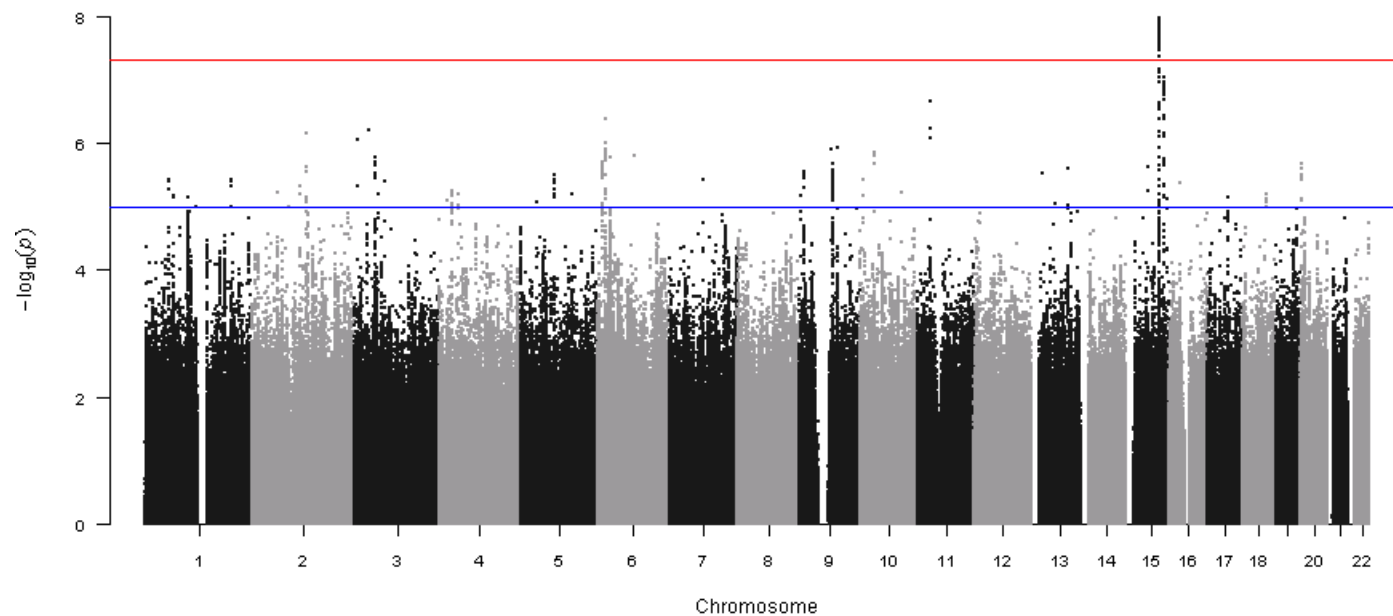

# QQ plot for GWAS of mother's age at death in 52,776 UK Biobank participants (9million imputed variants)

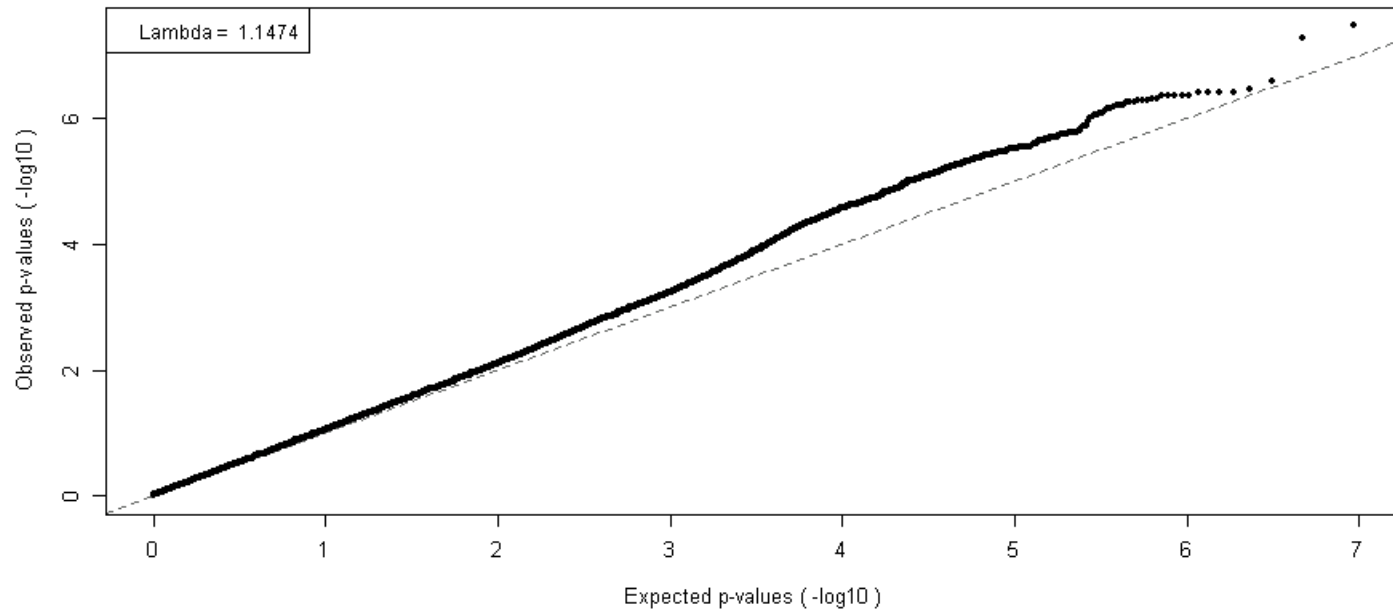

Manhattan plot of above data

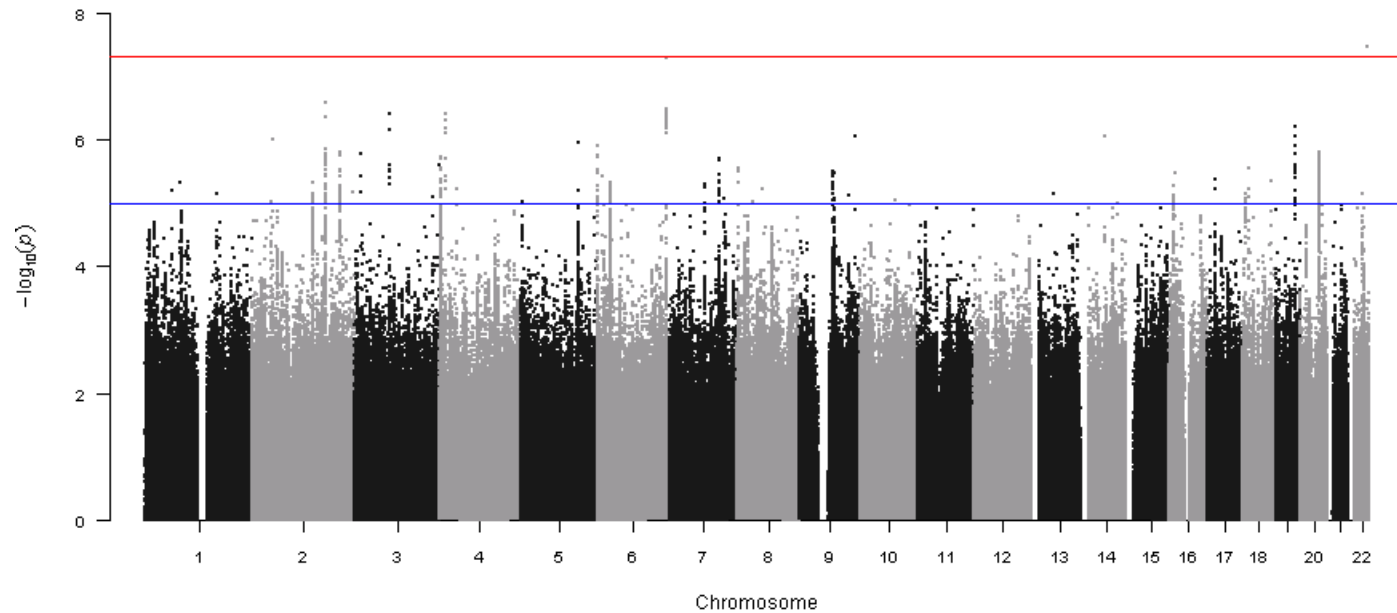

# QQ plot for GWAS of combined parent's age at death in 45,627 UK Biobank participants (9million imputed variants)

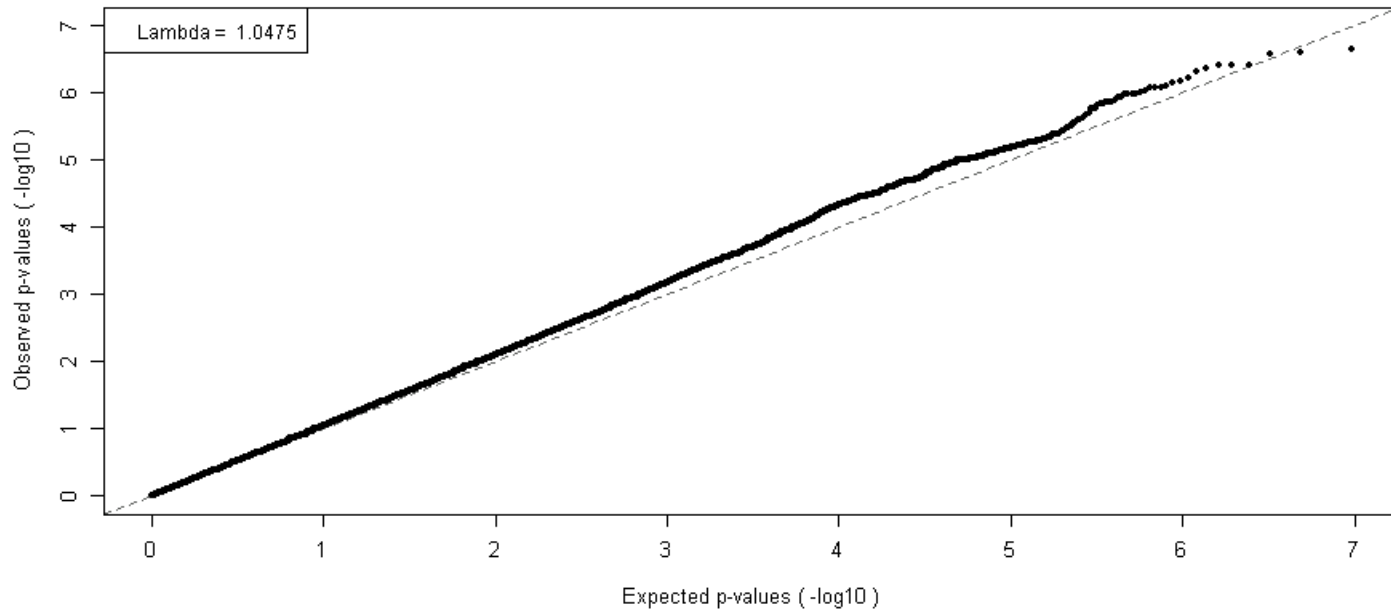

Manhattan plot of above data

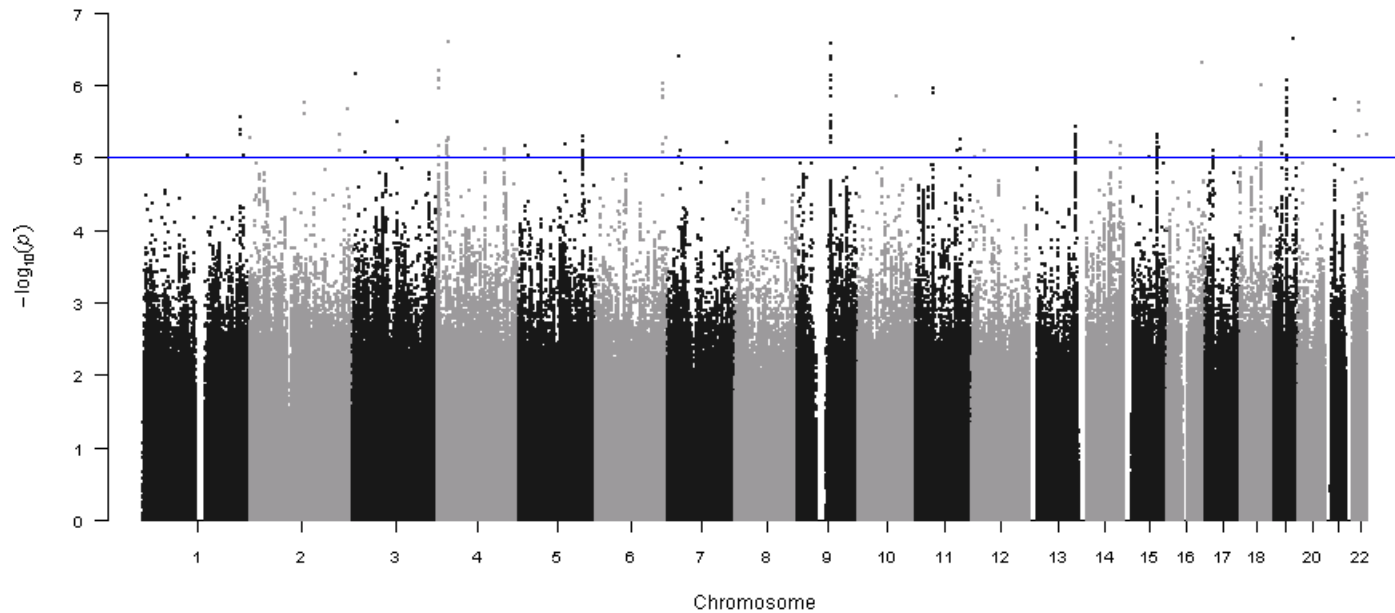

# QQ plot for GWAS of “top 1% of age at death range” in 42,273 UK Biobank participants (9million imputed variants)

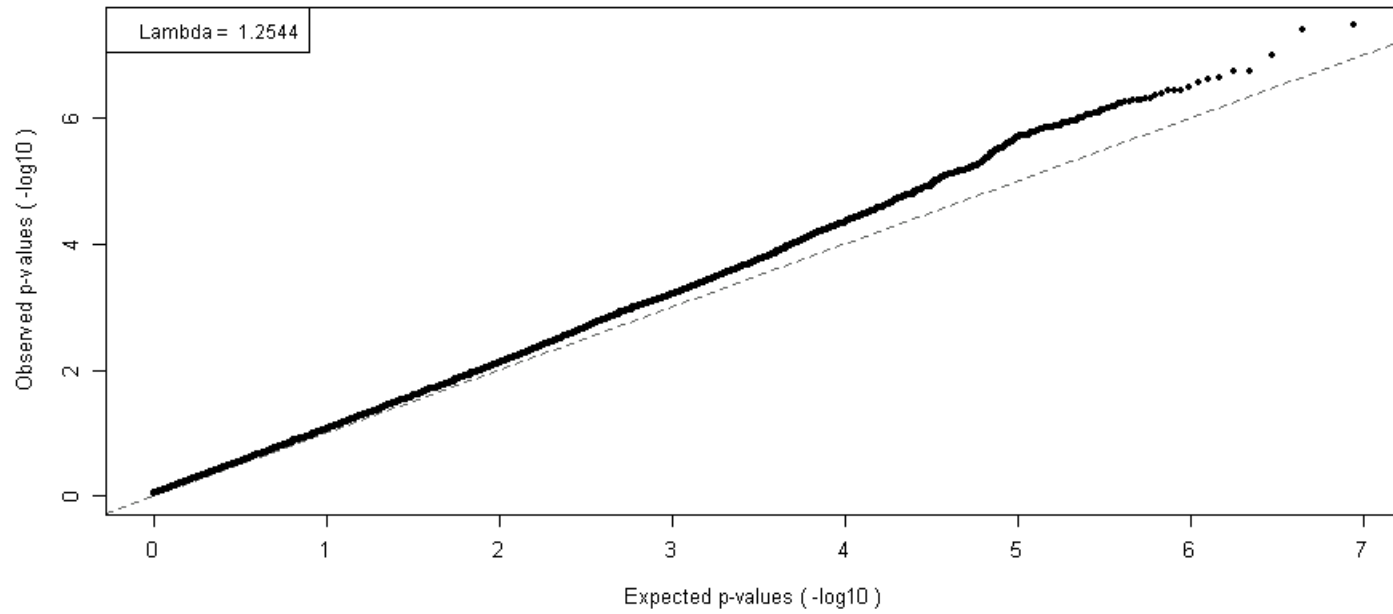

Manhattan plot of above data

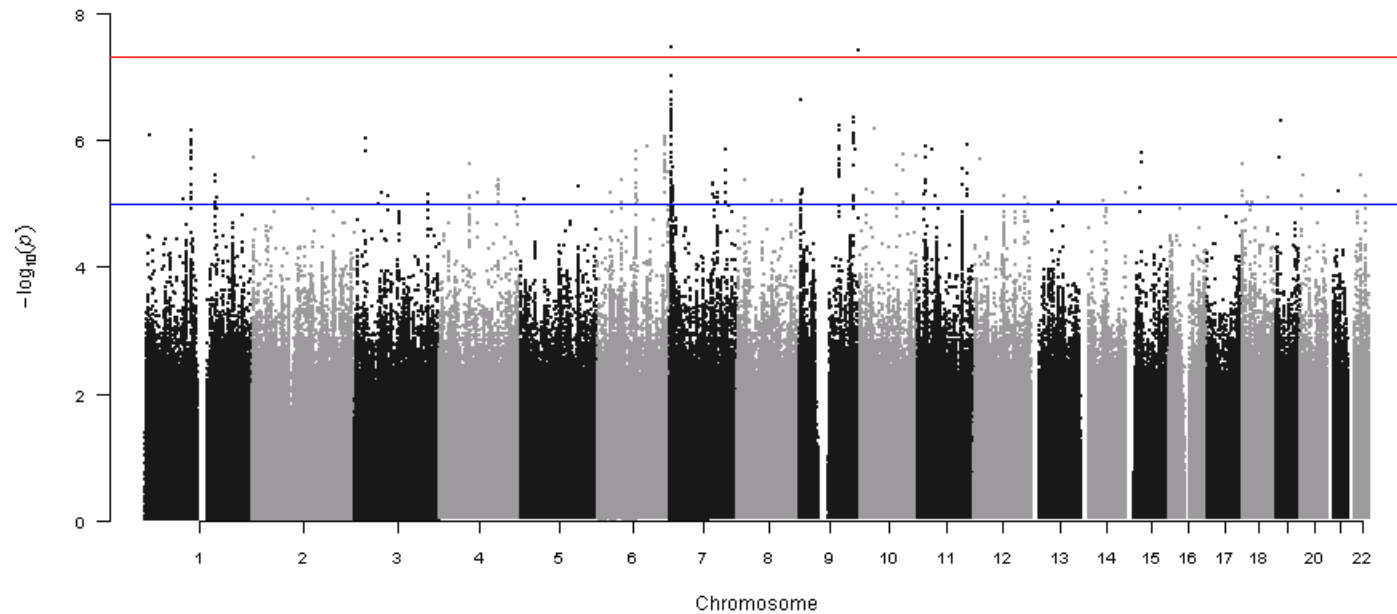

# Locus Zoom plot displaying variants +/- 250kbp around variant rs1051830

P-values are the association with Father's age at death

Plotted SNPs 

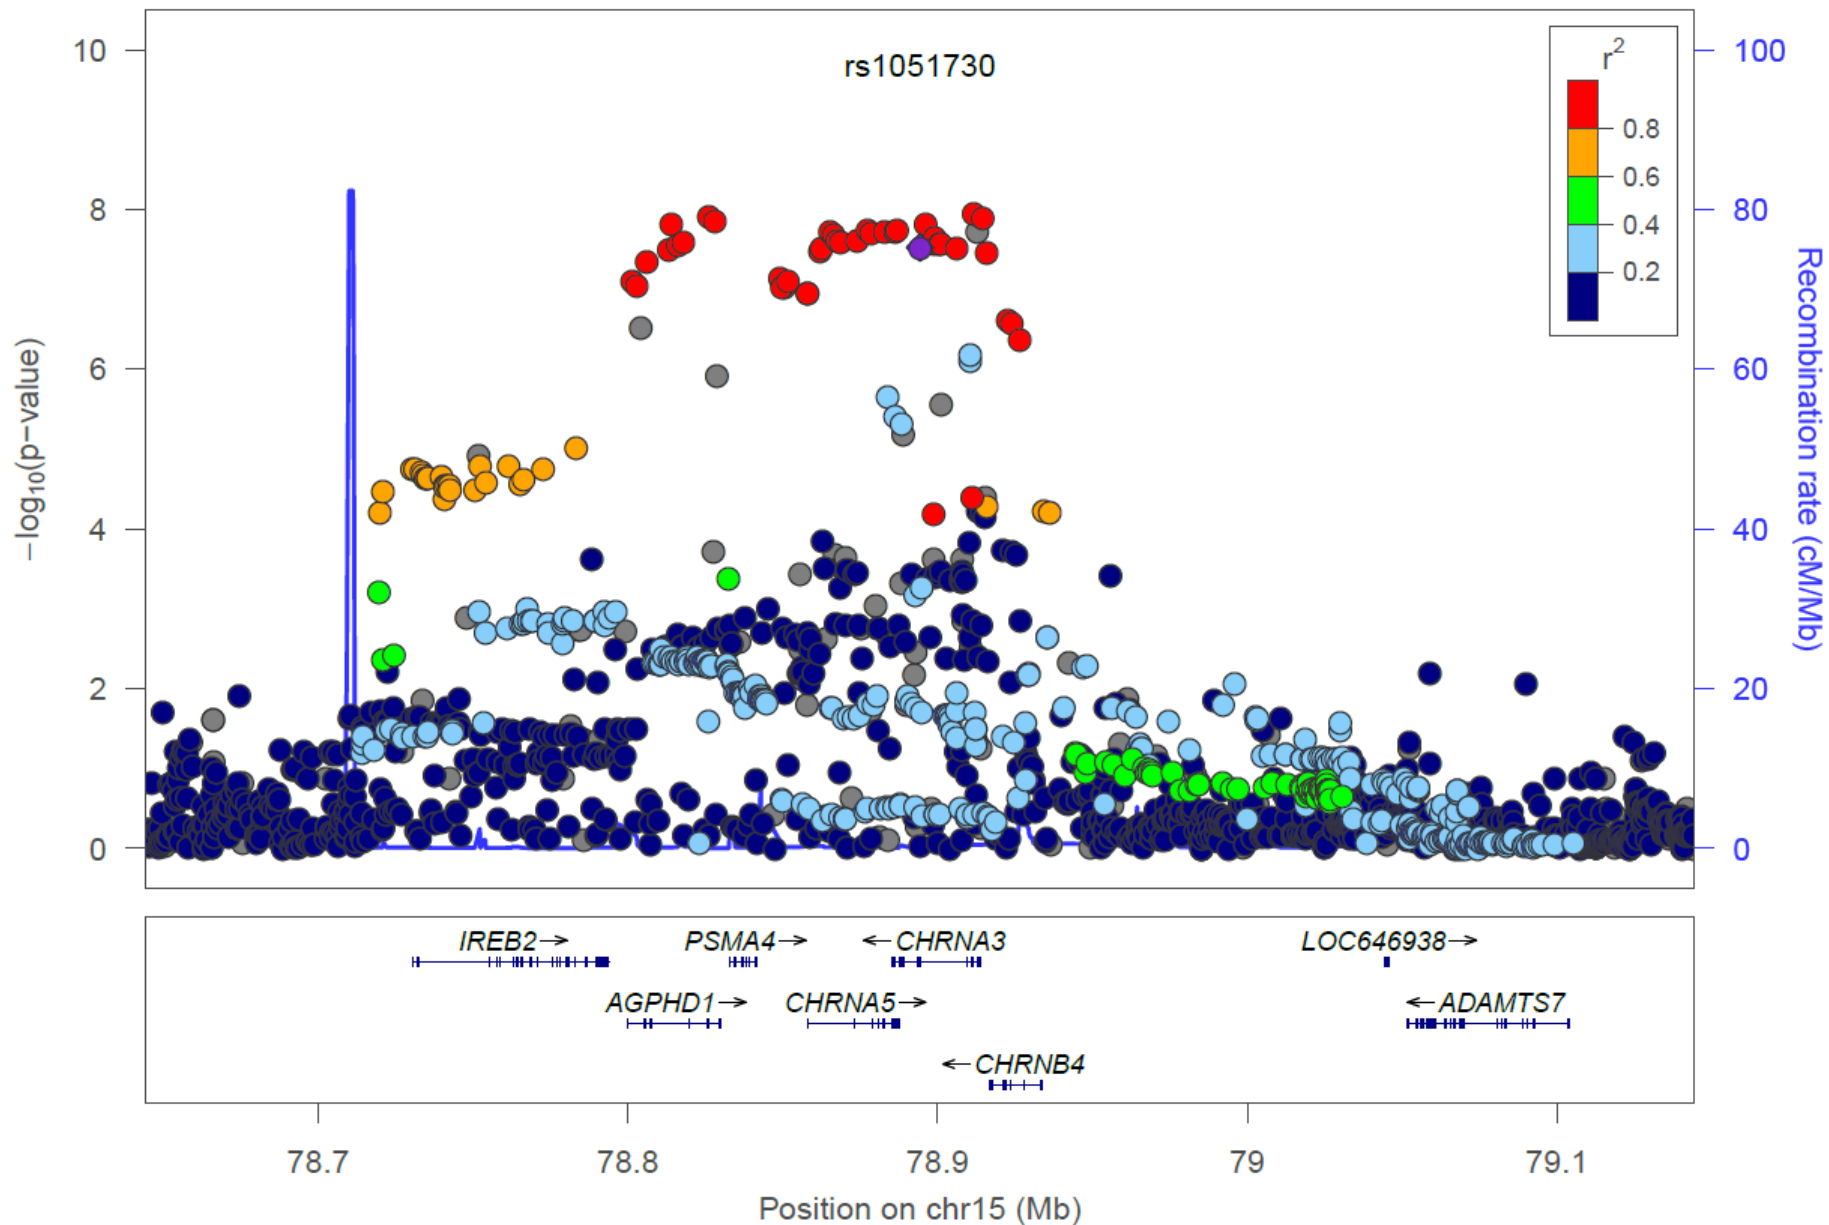

Locus Zoom plot displaying variants +/- 250kbp around variant rs62227724  
P-values are the association with Mother's age at death

Plotted SNPs

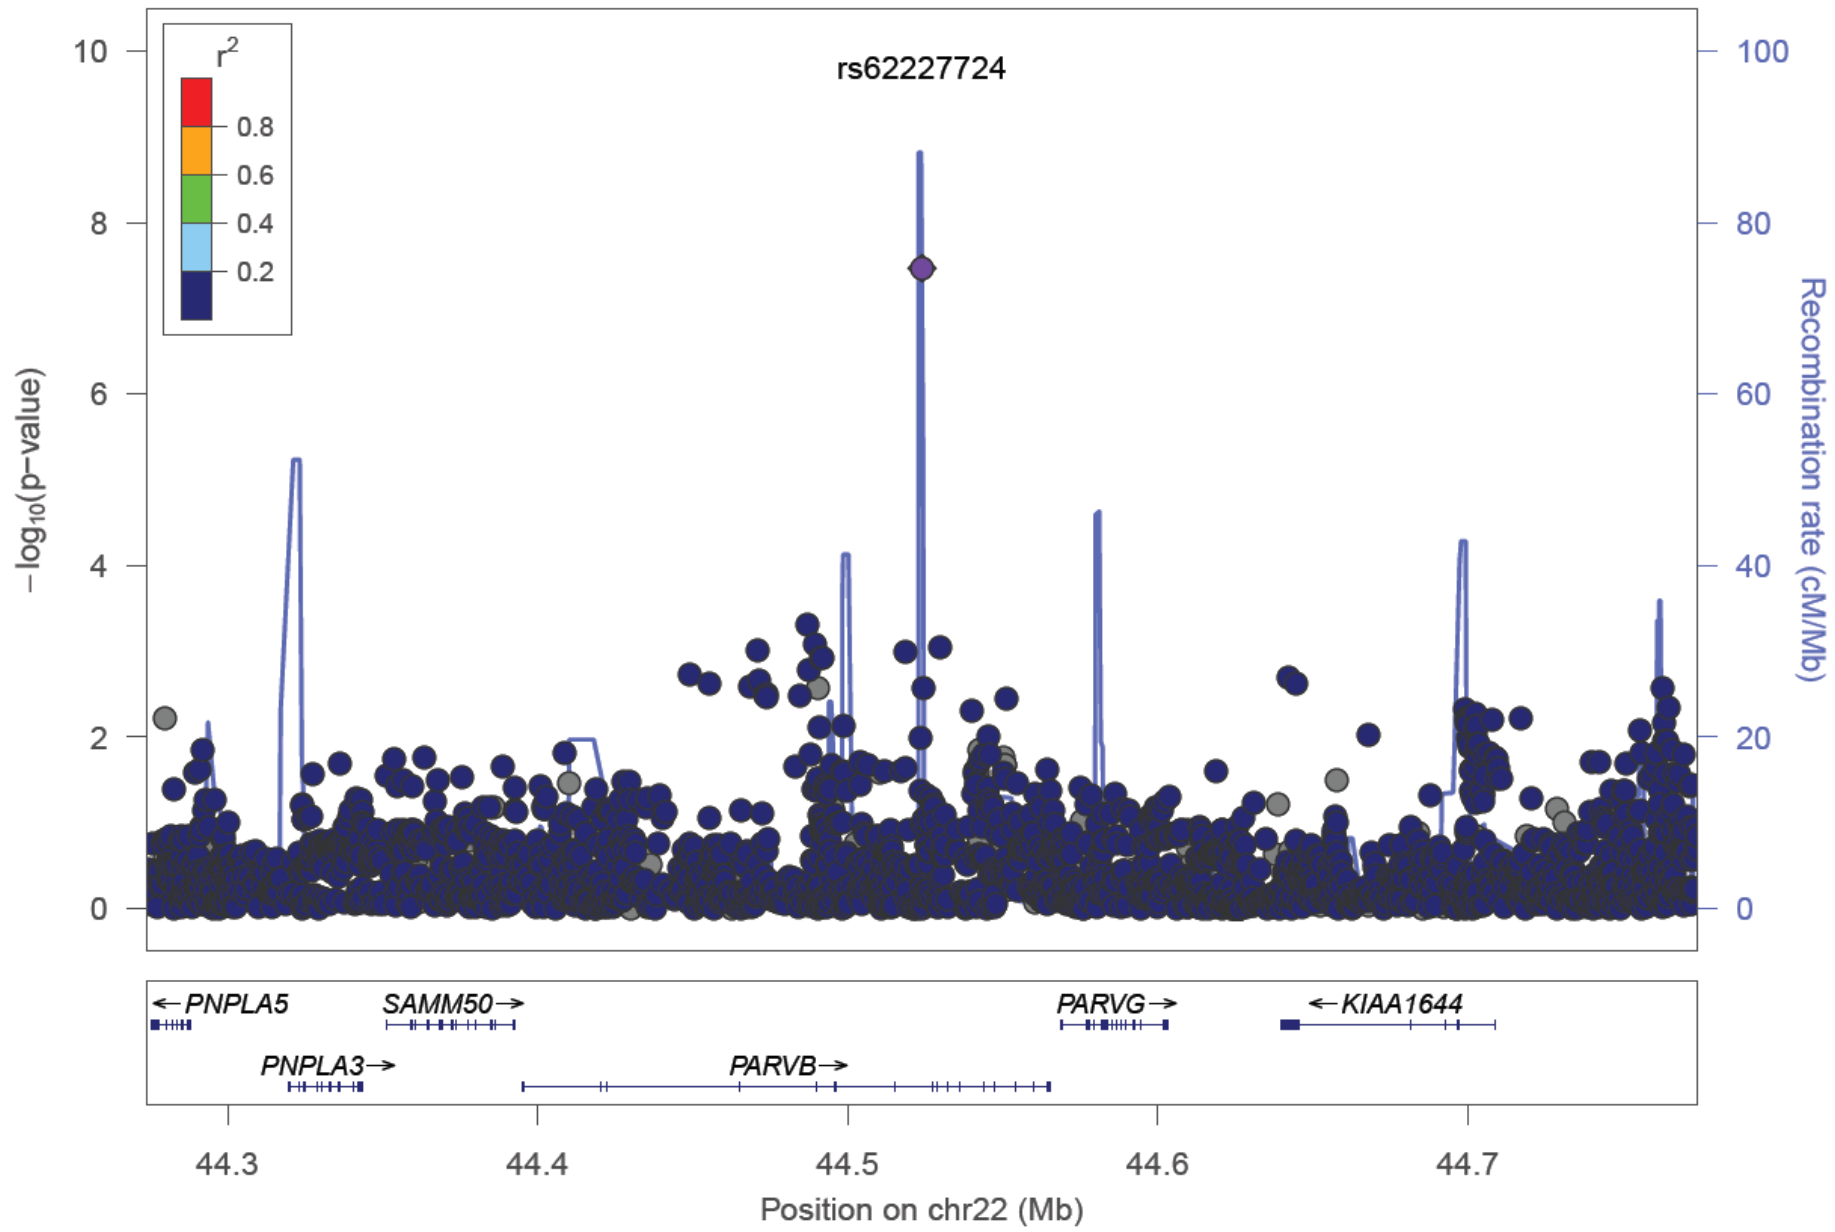

# Locus Zoom plot displaying variants +/- 250kbp around variant rs75824829

P-values are the association with "top 1% of age at death range"

Plotted SNPs 

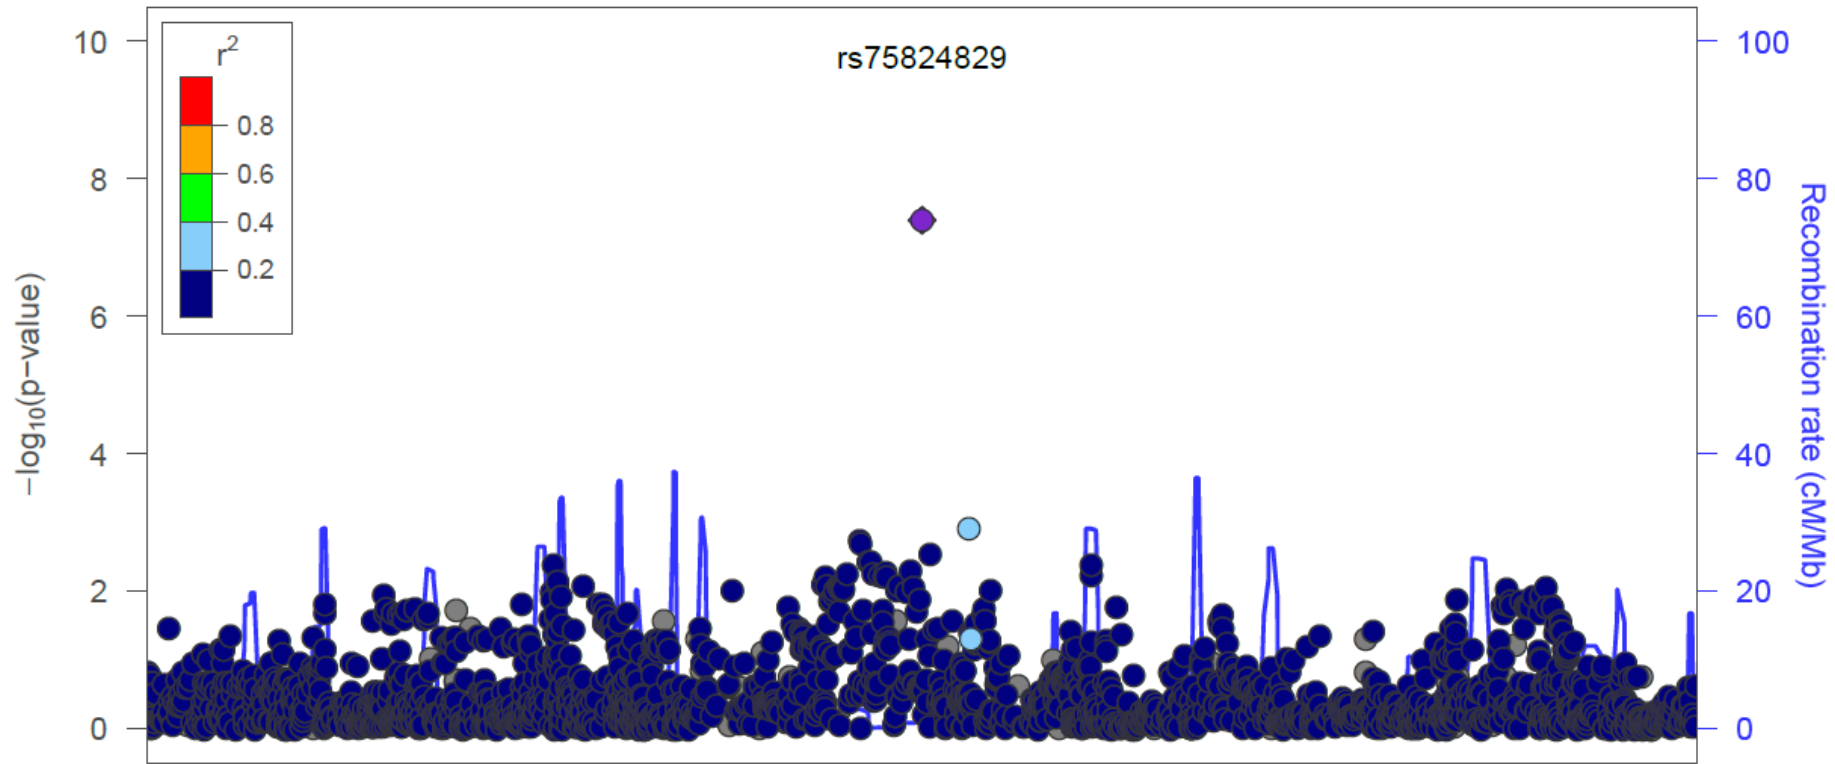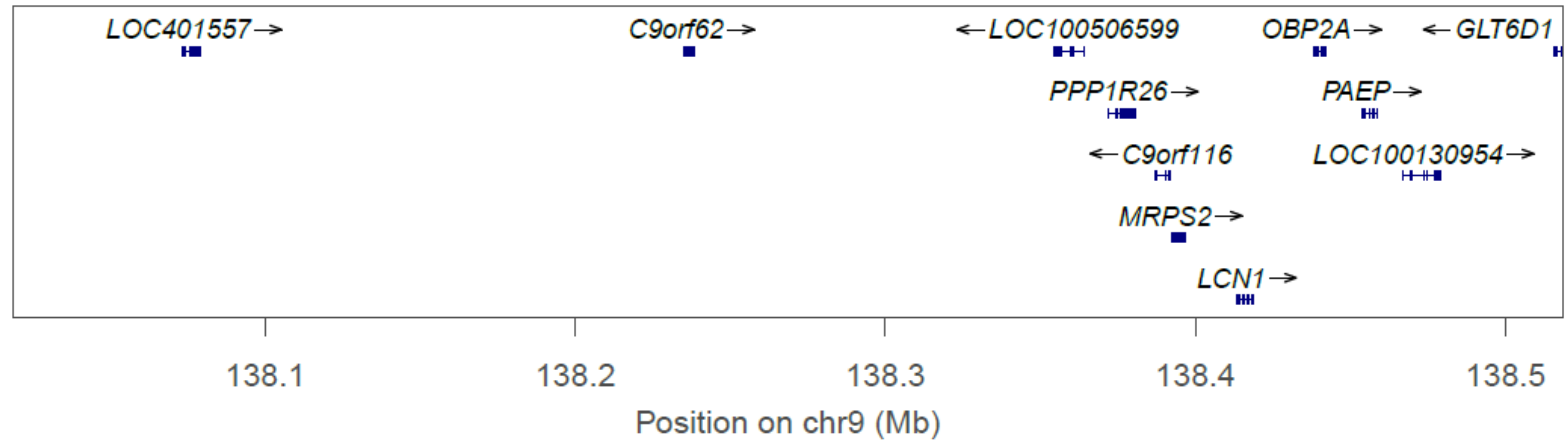



# Locus Zoom plot displaying variants +/- 250kbp around variant rs528161076

P-values are the association with "top 1% of age at death range"

Plotted SNPs

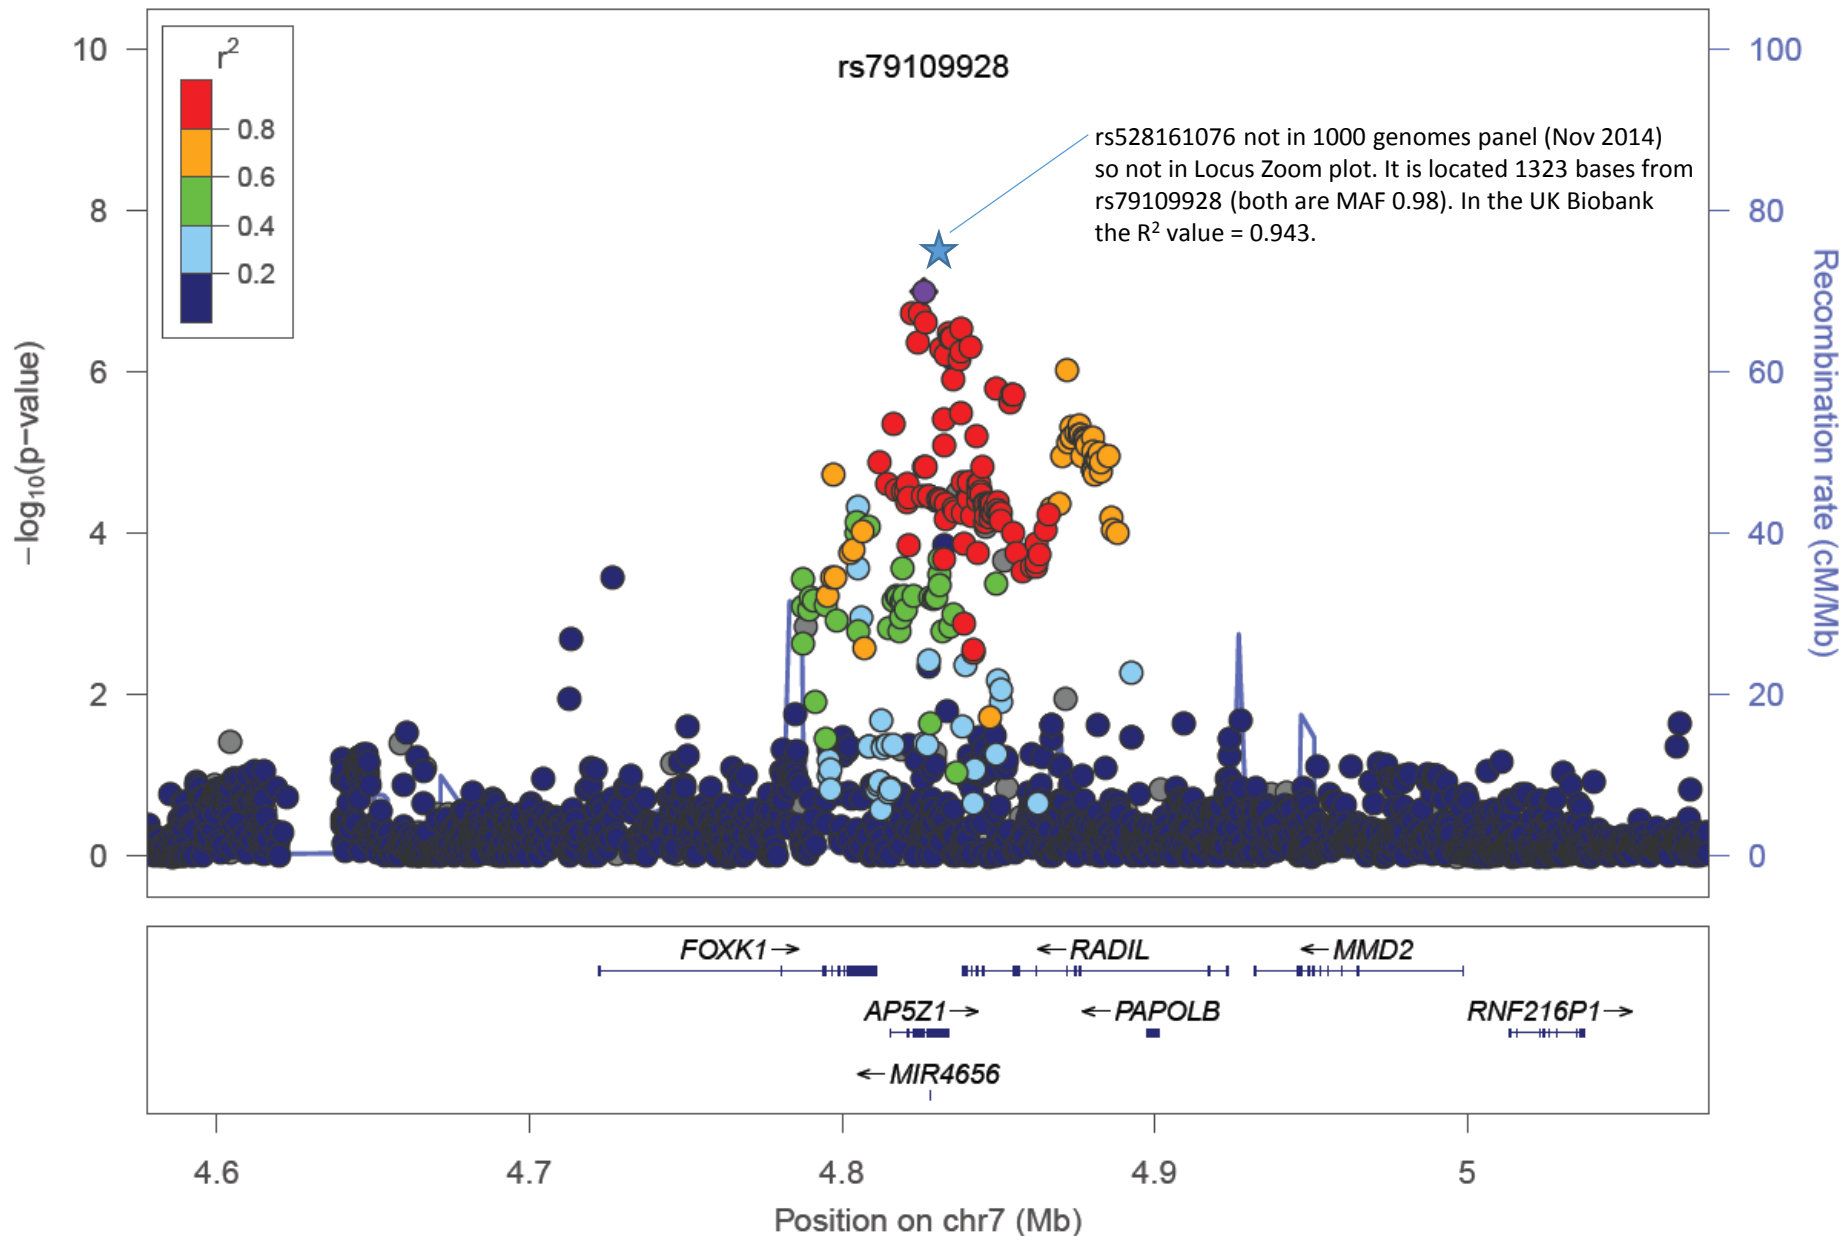

Supplement: Supplementary file [file 038430-2.pdf]
